# Supplementary material
Source: PubMed Central journal article supplement (PMC6648171)
Supplement: Supp_Fig1.pdf [file Supp_Fig1.pdf]

## Supplementary Data

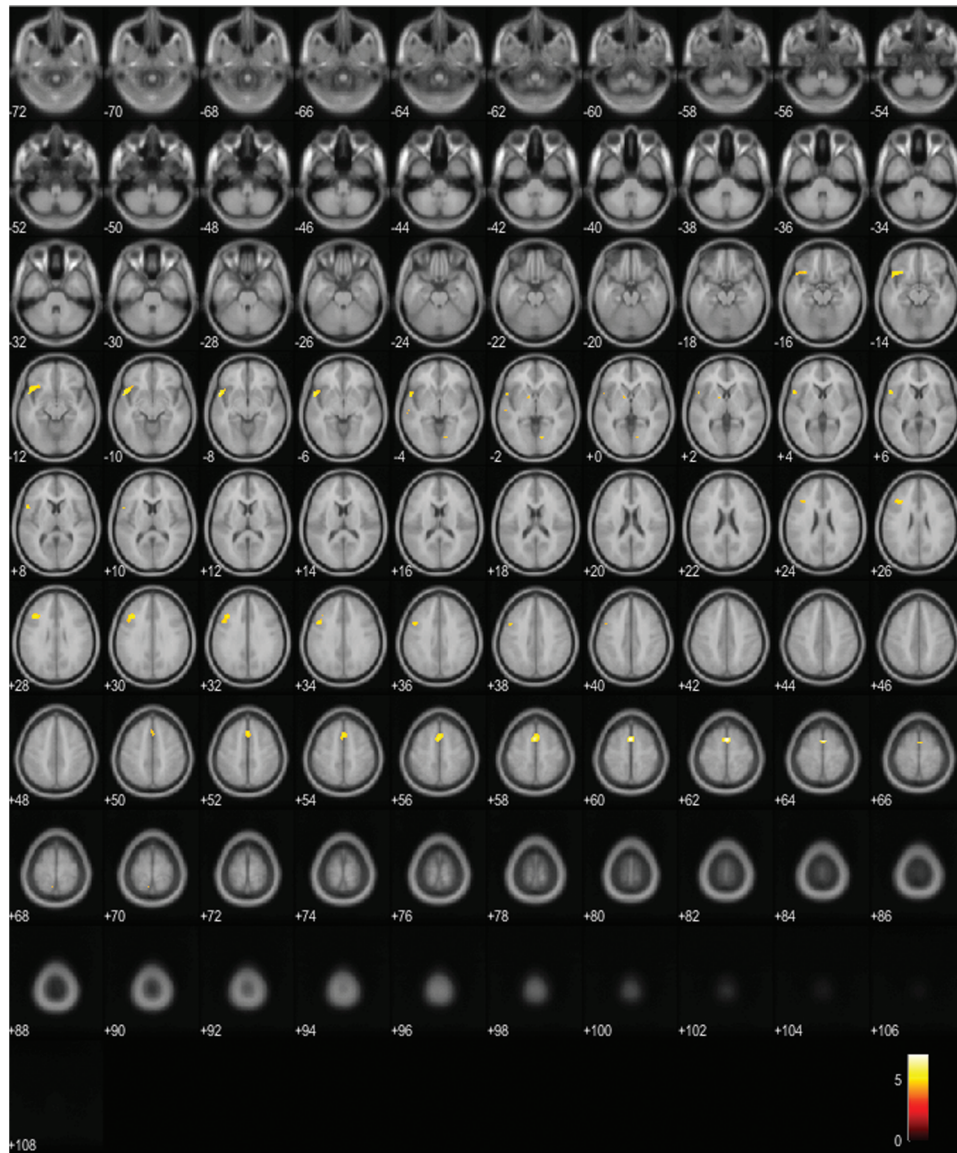

**SUPPLEMENTARY FIG. S1.** Group composite fMRI activation map for the verb generation task (on>off) ( $N=17$ ). The contrast is FWE-corrected  $p < 0.05$ . Axial slices  $Z = -72$  to  $108$ , two slides are incremental. Hotter color is represented in red color, scale:  $t = 0$  to  $5$ . Neurological orientation (L, left; R, right). fMRI, functional magnetic resonance imaging; FWE, familywise error rate.
