# Supplementary material
Source: PubMed Central journal article supplement (PMC6648171)
Supplement: Supp_Table1.pdf [file Supp_Table1.pdf]

SUPPLEMENTARY TABLE S1. GROUP COMPOSITE CONTRAST (ON>OFF) DURING VERB GENERATION

| <i>Region</i>                 | <i>Cluster size</i> | <i>BA</i>          | <i>Cluster centroid</i> |           |           |
|-------------------------------|---------------------|--------------------|-------------------------|-----------|-----------|
|                               |                     |                    | <i>X</i>                | <i>Y</i>  | <i>Z</i>  |
| —                             | 254                 | Outside defined BA | 0                       | 6         | 62        |
| Left superior temporal gyrus  | 288                 | Left BA 22         | -54                     | 10        | -8        |
| <b>Left dorsolateral PFC</b>  | <b>217</b>          | <b>Left BA 9</b>   | <b>-38</b>              | <b>24</b> | <b>30</b> |
| Right visual association area | 18                  | Left BA 18         | 12                      | -72       | -2        |
| —                             | 15                  | Outside defined BA | -12                     | 4         | 0         |
| Left superior parietal lobule | 5                   | Left BA 7          | -6                      | -54       | 68        |
| Left superior temporal gyrus  | 7                   | Left BA 22         | -56                     | -22       | -2        |
| Left insula                   | 1                   | Left BA 13         | -36                     | 18        | 2         |
| —                             | 1                   | Outside defined BA | 50                      | 10        | -10       |

Coordinates given in the MNI space. Bolded area highlights DLPFC activation.

BA, Brodmann area; DLPFC, dorsolateral prefrontal cortex; MNI, Montreal Neurological Institute; PFC, prefrontal cortex.
